# Supplementary material
Source: PubMed Central journal article supplement (PMC4117228)
Supplement: supp_127.15.3227_JCS147447.pdf [file supp_127.15.3227_JCS147447.pdf]

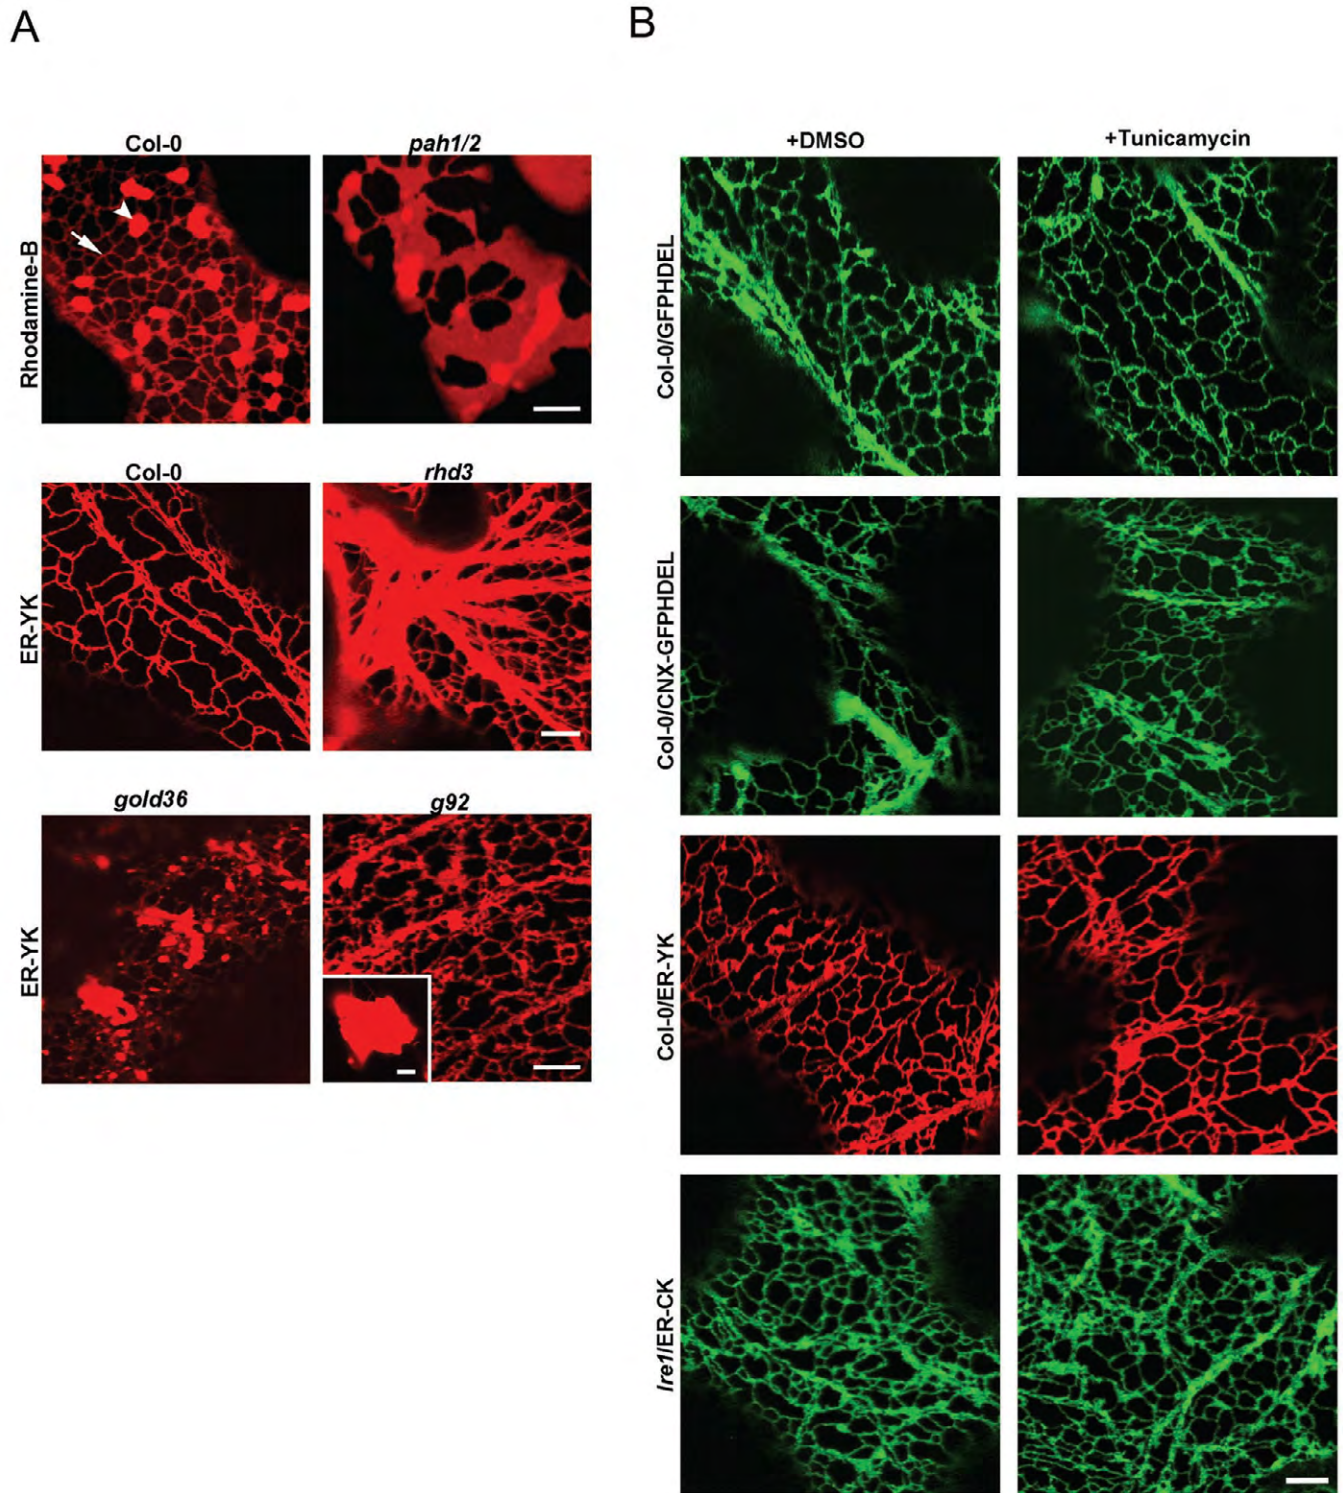

**Fig. S1. ER phenotypes of Arabidopsis mutants with either defective ER structure or UPR signaling.**

(A) Representative images of 12-day-old cotyledon epidermal cells with the following genotypes: wild type, *pah1/2*, *gold36*, *rhd3* and *g92*, either stained with Rhodamine-B (top panel) or expressing the ER lumen marker (ER-YK). Note that Rhodamine-B stains the ER network (arrows) and Golgi stacks (arrowheads). Inset indicates the inner region of the cell. (B) Col-0 or *ire1* expressing the ER marker GFP-HDEL (lumenal marker) or calnexin-GFP (CNX-GFP; membrane marker) in control conditions (DMSO) and Tm (0.5  $\mu\text{g}/\text{ml}$ ) treatment for 1 day. No obvious differences were noted in the morphology of the ER in response to the treatment and in the two backgrounds. Scale bars= 5 mm.

A

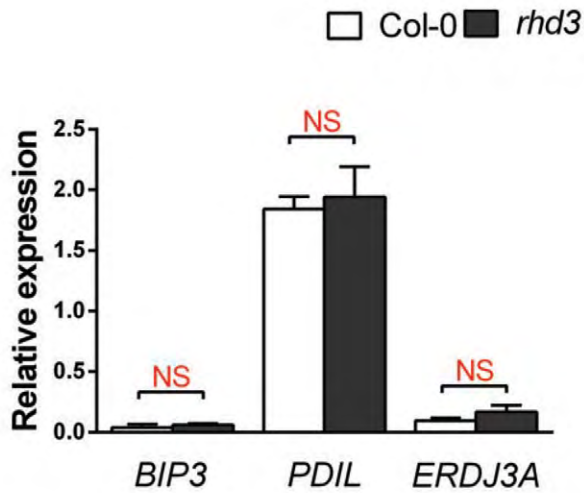

B

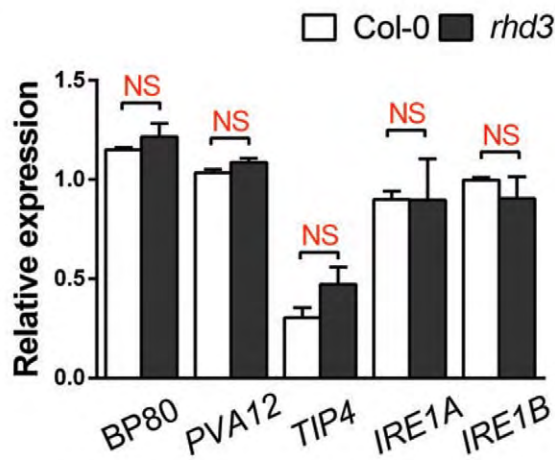

C

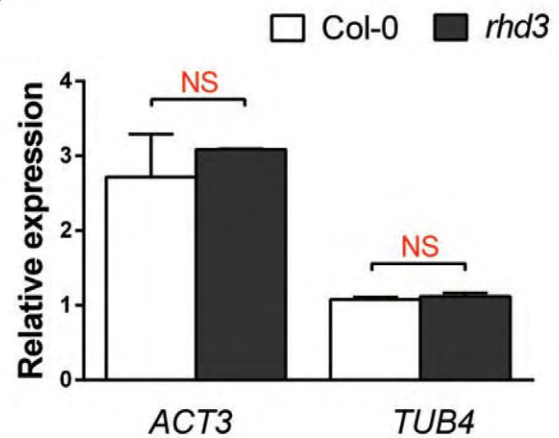

**Fig. S2. Loss of RHD3 does not affect the basal levels of the UPR and the genes encoding secretory and cytosolic proteins in conditions of ER stress**

(A) qRT-PCR of UPR indicators. cDNA was synthesized using 14-day-old seedlings exposed to medium containing DMSO, which serves as ER stress treatment control, for 1 day. The experiment shows that the basal levels of UPR indicators in wild type and *rhd3* are low and similar. (B, C) Transcriptional levels of secretory proteins such as the prevacuolar sorting receptor, BP80, the ER associated VAMP-like protein, PVA12, and the tonoplast intrinsic protein, TIP4, and AtIRE1 isoforms IRE1A, IRE1B, as well as cytosolic proteins actin (ACT3) and tubulin (TUB4). Error bars represent SE among three replicates. (NS, not significant).

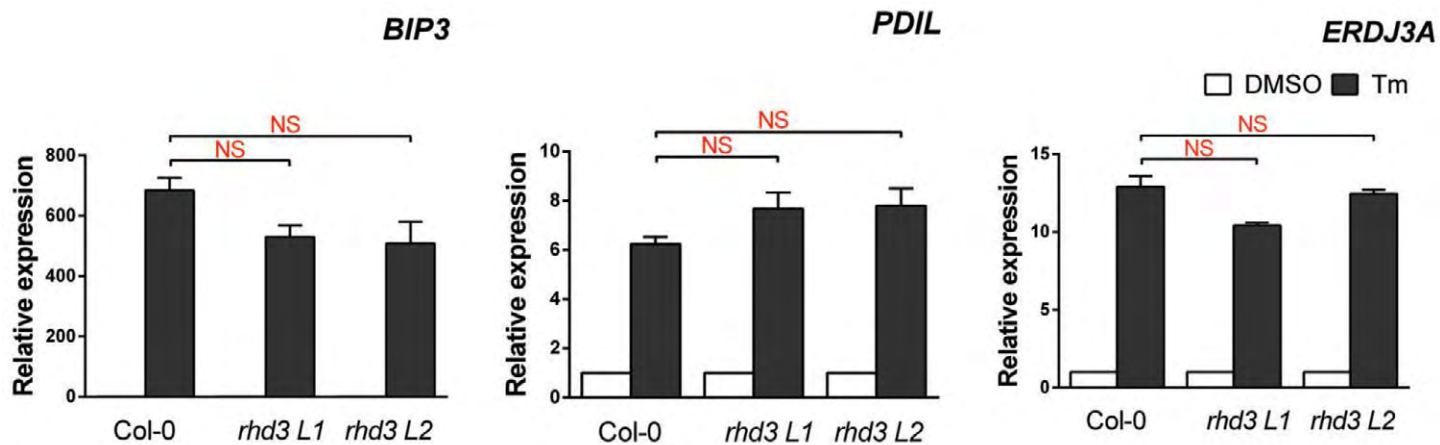

**Fig. S3. The compromised UPR induction phenotype is specific to the loss of RHD3**

qRT-PCR of UPR indicators in wild type and *RHD3*-like mutants. cDNA was synthesized using 14-day-old seedlings treated with Tm (0.5  $\mu$ g/ml) for 1 day. Values are presented relative to indicated DMSO control, which was set to 1. Error bars represent SE of three replicates. No significant differences were found from the corresponding controls (mutant versus wild type under treatment). (NS, not significant).

**Supplemental Table 1.** Loci numbers and primers .

| Primer name    | AGI number | Sequence                           | Purpose                                                    |
|----------------|------------|------------------------------------|------------------------------------------------------------|
| UBQ10 For      | At4g05320  | 5'-GGCCTTGATAATCCCTGATGAATAAG-3'   | For amplifying endogenous transcript of UBQ10 by qRT-PCR   |
| UBQ10 Rev      | At4g05320  | 5'-AAAGAGATAACAGGAACGGAAACATAGT-3' | For amplifying endogenous transcript of UBQ10 by qRT-PCR   |
| BIP3 For       | At1g09080  | 5'-CGAAACGCTCTGATTGGAAGAA-3'       | For amplifying endogenous transcript of BIP3 by qRT-PCR    |
| BIP3 Rev       | At1g09080  | 5'-GGCTTCCCCTCTTTGTTCCAC-3'        | For amplifying endogenous transcript of BIP3 by qRT-PCR    |
| PDIL For       | At1g21750  | 5'-AAGTGGTCTGCTTCTGTTGAA-3'        | For amplifying endogenous transcript of PDIL by qRT-PCR    |
| PDIL Rev       | At1g21750  | 5'-TTGAACAGCCTCACTGCAGGT-3'        | For amplifying endogenous transcript of PDIL by qRT-PCR    |
| ERdj3A for     | At3g08970  | 5'-GTGAAAGCGAAGAGCGTTGAT-3'        | For amplifying endogenous transcript of ERDJ3A by qRT-PCR  |
| ERdj3A Rev     | At3g08970  | 5'-TCACGCTGCTTTGCATCCT-3'          | For amplifying endogenous transcript of ERDJ3A by qRT-PCR  |
| IRE1a_FWD      | At2g17520  | 5'-GCTTCAGACCTCATATCCCG-3'         | For amplifying endogenous transcript of IRE1A by qRT-PCR   |
| IRE1a_REV      | At2g17520  | 5'-AGCATCACGAAGGAAAGACAG-3'        | For amplifying endogenous transcript of IRE1A by qRT-PCR   |
| IRE1b_FWD      | At5g24360  | 5'-GGTGGGATGAGAAACTGGATAG-3'       | For amplifying endogenous transcript of IRE1B by qRT-PCR   |
| IRE1b_REV      | At5g24360  | 5'-AGTTTGTCCGTATGACCCG-3'          | For amplifying endogenous transcript of IRE1B by qRT-PCR   |
| bZIP60s_FWD    | At1g42990  | 5'-GGAGACGATGATGCTGTGGCT-3'        | For amplifying endogenous transcript of sBZIP60 by qRT-PCR |
| bZIP60s_REV    | At1g42990  | 5'-CAGGGAACCCAACAGCAGACT-3'        | For amplifying endogenous transcript of sBZIP60 by qRT-PCR |
| BP80 For1      | At3g52850  | 5'-GCTCTTCCGGTGGTGATATG-3'         | For amplifying endogenous transcript of BP80 by qRT-PCR    |
| BP80 Rev1      | At3g52850  | 5'-CAGGATGTGAACCGACTCA-3'          | For amplifying endogenous transcript of BP80 by qRT-PCR    |
| PVA12 For1     | At2g45140  | 5'-CAAGTTAAGACGACGAATCCAA-3'       | For amplifying endogenous transcript of PVA12 by qRT-PCR   |
| PVA12 Rev1     | At2g45140  | 5'-TCTGGGATGAACAACACCAGTATT-3'     | For amplifying endogenous transcript of PVA12 by qRT-PCR   |
| At Tip4;1 For2 | At2g25810  | 5'-GGACTCGCCGGTTTCATCTA-3'         | For amplifying endogenous transcript of TIP4 by qRT-PCR    |
| At Tip4;1 Rev2 | At2g25810  | 5'-GTCAGCGACTGGGACATGTG-3'         | For amplifying endogenous transcript of TIP4 by qRT-PCR    |
| At Actin3 For2 | At3g53750  | 5'-CAGGCCCGTCGATTGTC-3'            | For amplifying endogenous transcript of Actin3 by qRT-PCR  |
| At Actin3 Rev2 | At3g53750  | 5'-TCCGGAAGCAGACTTAACCTCAA-3'      | For amplifying endogenous transcript of Actin3 by qRT-PCR  |
| At Tub4 For2   | At5g44340  | 5'-TGGATCCCAACAACGTCAA-3'          | For amplifying endogenous transcript of TUB4 by qRT-PCR    |
| At Tub4 Rev2   | At5g44340  | 5'-GCCATTTTCAAACCTTTGGT-3'         | For amplifying endogenous transcript of TUB4 by qRT-PCR    |
| G92/Sec24A     | At3g07100  | n.a.                               | n.a.                                                       |
| Gold36         | At1g54030  | n.a.                               | n.a.                                                       |
| Pah1           | At3g09560  | n.a.                               | n.a.                                                       |
| Pah2           | At5g42870  | n.a.                               | n.a.                                                       |
| RHD3           | At3g13870  | n.a.                               | n.a.                                                       |
| RHD3-L1        | At5g45160  | n.a.                               | n.a.                                                       |
| RHD3-L2        | At1g72960  | n.a.                               | n.a.                                                       |
